# Supplementary material for: On the structure and electronic properties of Ptn clusters: new most stable structures for n = 16–17
Source: Royal Society of Chemistry journal article supplement (doi:10.1039/d3cp04455f), 2023-01-01
Supplement: d3cp04455f1.pdf [file d3cp04455f1.pdf]

Electronic Supporting Information: On the structure and electronic properties of  $Pt_n$  clusters: new most stable structures for  $n=16-17^\dagger$

José Manuel Guevara-Vela,<sup>a</sup> Tomás Rocha-Rinza,<sup>b</sup> Peter L. Rodríguez-Kessler,<sup>\*c</sup> and Alvaro Muñoz-Castro,<sup>\*d</sup>

---

<sup>a</sup> Departamento de Química Física Aplicada, Universidad Autónoma de Madrid, Madrid 28049, Spain.

<sup>b</sup> Instituto de Química, Universidad Nacional Autónoma de México, Circuito Exterior, Ciudad Universitaria, Delegación Coyoacán, México City C.P. 04510, Mexico.

<sup>c</sup> Centro de Investigaciones en Óptica A.C., Loma del Bosque 115, Col. Lomas del Campestre, León, Guanajuato, Mexico. E-mail: plkessler@cio.mx

<sup>d</sup> Facultad de Ingeniería, Arquitectura y Diseño, Universidad San Sebastián, Bellavista 7, Santiago, 8420524, Chile. E-mail: alvaro.munozc@uss.cl

Table 1 Theoretical and experimental bond lengths ( $d_{Pt-Pt}$ ), vibrational frequency ( $\omega$ ), ionization potentials (IP) and dissociation energies ( $D_e$ ) for Pt<sub>2</sub> dimer.

| DFT functional    | $d_{Pt-Pt}$ | $\omega$ | IP    | $D_e$ |
|-------------------|-------------|----------|-------|-------|
| B3LYP             | 2.358       | 228.83   | 8.802 | 2.610 |
| B3P86             | 2.335       | 238.34   | 8.978 | 2.758 |
| PW91              | 2.353       | 227.07   | 9.028 | 4.010 |
| B3PW91            | 2.336       | 237.81   | 8.846 | 2.682 |
| BP86              | 2.354       | 225.93   | 9.095 | 3.668 |
| BPW91             | 2.356       | 225.33   | 8.963 | 3.362 |
| M06               | 2.365       | 223.23   | 8.997 | 2.939 |
| M06-2X            | 2.306       | 253.14   | 8.409 | 1.534 |
| M06-L             | 2.430       | 191.35   | 8.788 | 3.060 |
| CAM-B3LYP         | 2.327       | 247.97   | 9.373 | 2.239 |
| PBE0              | 2.328       | 241.72   | 8.710 | 2.608 |
| TPSS              | 2.353       | 227.41   | 8.791 | 3.369 |
| TPSSh             | 2.343       | 233.46   | 9.056 | 3.034 |
| LC-BLYP           | 2.302       | 262.66   | 9.377 | 2.543 |
| Exp. <sup>a</sup> | 2.340       | 259.40   | –     | –     |
| Exp. <sup>b</sup> | –           | –        | 8.800 | 3.140 |

<sup>a</sup> Ref. (doi:10.1021/cr00076a005)

<sup>b</sup> Ref. (doi:9.1063/1.455577)

## Cartesian coordinates

The lowest energy structures of Pt<sub>n</sub> (n=15-17) clusters calculated using the Orca program and the TPSS/Def2TZVP approach.

### Pt<sub>15\_1</sub>

Pt -3.58681344974439 -1.11065064262805 0.66992026141164  
Pt -1.32435841953484 -2.13063450148272 1.18864612459464  
Pt 0.99793905666440 -3.15504475688956 1.26958336504223  
Pt -2.54949476624107 1.24156627537590 0.87928965937958  
Pt -0.27477461484810 0.19424909843016 1.38252977179551  
Pt 2.03478537953435 -0.86162361900176 1.51557950290291  
Pt -1.16175028541180 3.19443619568735 -0.00644658272408  
Pt 0.90648308735616 2.46683593674375 1.26428354852487  
Pt 3.20908938856049 1.38980138157090 1.50493125967443  
Pt -1.85077089188207 -0.21760593895605 -1.05117535887312  
Pt -0.35235362785371 1.62334576961221 -1.86429642058122  
Pt 0.31388419132917 -1.85438148004679 -0.82013784738236  
Pt 1.67995344748687 0.82761398496138 -0.54143039794589  
Pt -0.23218934433697 -0.64694948972005 -3.10310394922991  
Pt 2.19037184892152 -0.96095821365665 -2.28817493658924

### Pt<sub>15\_2</sub>

Pt -1.96200335395462 -1.20713663262998 -2.66138800582303  
Pt -1.85671412026740 0.94795848122465 -1.29993620547597  
Pt -1.82166799806916 3.02901413129850 0.16875951860604  
Pt -2.03701919104700 -1.56642846744706 -0.13285766029248  
Pt -1.99403270929692 0.82451878106190 1.47580198492387  
Pt -2.07139525976386 -1.55394159353728 2.42500760983462  
Pt 0.56643291418984 -1.32417507488435 -2.58559958880617  
Pt 0.66862322121160 0.94767826922362 -1.46489707601335

|    |                  |                   |                   |
|----|------------------|-------------------|-------------------|
| Pt | 0.72375130823661 | 2.89454666095117  | 0.13223642493761  |
| Pt | 0.45659359575909 | -1.56709837705701 | -0.09065733425622 |
| Pt | 0.49769512116928 | 0.72212831321755  | 1.40718802526883  |
| Pt | 0.47089729810347 | -1.57053003370365 | 2.45056130570717  |
| Pt | 2.80008300181510 | -0.65514264074895 | -1.43818675919321 |
| Pt | 2.82741907263677 | 1.32422998039000  | 0.39918414605834  |
| Pt | 2.73133609927721 | -1.24562179735909 | 1.21478461452395  |

**Pt<sub>15\_3</sub>**

|    |                   |                   |                   |
|----|-------------------|-------------------|-------------------|
| Pt | -1.94676241973727 | -1.08473600356136 | -2.73219823413963 |
| Pt | -1.77527186162463 | 0.60149514083752  | -0.78780213927935 |
| Pt | -1.78484115492614 | 3.03297250764613  | 0.04996484917108  |
| Pt | -2.08877099732672 | -1.84781816690541 | -0.27924451294792 |
| Pt | -1.94763197798445 | 1.04114385161928  | 1.68506608882830  |
| Pt | -2.17584394251370 | -1.44134954316053 | 2.25427319981957  |
| Pt | 0.58992626344741  | -1.31465305245053 | -2.61402351274041 |
| Pt | 0.70455973210382  | 0.92636817176937  | -1.44282327197879 |
| Pt | 0.75308265286269  | 2.90783806827140  | 0.10061346478192  |
| Pt | 0.42405776489696  | -1.66178687546090 | -0.12760066660140 |
| Pt | 0.54836821642515  | 0.76174653807422  | 1.44611596596983  |
| Pt | 0.37475385023617  | -1.55512192191056 | 2.41237742198179  |
| Pt | 2.83105605103661  | -0.62775360962144 | -1.47444685635731 |
| Pt | 2.86246996620201  | 1.41238790845654  | 0.33431762365143  |
| Pt | 2.63084685690208  | -1.15073301360372 | 1.17541157984091  |

**Pt<sub>16\_1</sub>**

|    |                   |                   |                   |
|----|-------------------|-------------------|-------------------|
| Pt | -2.94691437649493 | -0.02126861436433 | -1.36230067242425 |
| Pt | 1.61455907326112  | -1.44061831808738 | -2.70929453381246 |
| Pt | 1.47579206698029  | -1.41917819821645 | 2.43170320366704  |
| Pt | -0.48594060866457 | 1.12175776713598  | -1.39486053757228 |
| Pt | 2.51199143597421  | 0.69048046647814  | 1.36381936002993  |
| Pt | 2.44263193443281  | 2.84192008935210  | -0.03654264653053 |
| Pt | 2.01382904539281  | 0.76266151504195  | -1.48862304506710 |
| Pt | -0.89135415870206 | -1.01063872670618 | -2.67282412801297 |
| Pt | -1.25074468060417 | -1.55810265329453 | 2.37076001883812  |
| Pt | 0.27669733802017  | -3.41953772686072 | 0.96004588065947  |
| Pt | -0.00165338550138 | 0.66512490800281  | 1.54670302613498  |
| Pt | -0.06316126324392 | 2.90458401371368  | 0.33156947913135  |
| Pt | -2.51174390588872 | 2.49823030635441  | -0.28731512992173 |
| Pt | -2.52926872856945 | 0.43147615097174  | 1.30175301884008  |
| Pt | -1.16401662424678 | -1.58278765254186 | -0.19968497282214 |
| Pt | 1.50929683775461  | -1.46410332717941 | -0.15490832113752 |

**Pt<sub>16\_2</sub>**

|    |                   |                   |                   |
|----|-------------------|-------------------|-------------------|
| Pt | -2.19007104789273 | -2.46020952030192 | -1.89726072151274 |
| Pt | -2.08300429354584 | 0.03676121030920  | -1.24607959181531 |
| Pt | -1.95611437277677 | 2.56980504694640  | -1.74440273429894 |
| Pt | -2.42993570467605 | -1.73741396240237 | 0.54805381273326  |
| Pt | -2.23042567542561 | 1.69426061145161  | 0.66305379509066  |
| Pt | -2.65155860816597 | -0.07220857614812 | 2.45856256896741  |
| Pt | 0.38063086403603  | -2.62118331716828 | -1.50303709729825 |

|    |                   |                    |                   |
|----|-------------------|--------------------|-------------------|
| Pt | 0.48664938751694  | -0.065541944445977 | -1.60048379372071 |
| Pt | 0.57536548381291  | 2.45464592913171   | -1.42368894234646 |
| Pt | 0.10137552006882  | -1.61142030356910  | 0.78042578948666  |
| Pt | 0.26174231673160  | 1.38706330920154   | 0.87819640250305  |
| Pt | -0.08837066563982 | -0.16977474329662  | 2.85428007322457  |
| Pt | 2.49723121435097  | -1.35366474007832  | -0.65573260865228 |
| Pt | 2.67015548919352  | 1.95618261200190   | -0.07380004767295 |
| Pt | 2.24842539957492  | -0.15329517977366  | 1.74516551493259  |
| Pt | 4.40790469303711  | 0.14599356815579   | 0.21674758017945  |

### Pt<sub>16\_3</sub>

|    |                   |                   |                   |
|----|-------------------|-------------------|-------------------|
| Pt | 2.40987208266111  | -1.97559492594514 | -2.13877092071682 |
| Pt | 2.25740966391010  | -1.64674528351881 | 0.37443127090371  |
| Pt | 2.14792849253343  | -0.85889377283214 | 2.80586250660743  |
| Pt | 2.26848918577175  | 0.47755219990839  | -1.54404857294710 |
| Pt | 2.20608298754611  | 1.05675620825423  | 1.12337643476817  |
| Pt | 2.23830184038499  | 2.86552922648455  | -0.69106203861214 |
| Pt | -0.20393046270393 | -1.98763561531273 | -2.22309054340737 |
| Pt | -0.25995498223341 | -1.61797808768486 | 0.26423841427745  |
| Pt | -0.39082174404952 | -0.83995303447344 | 2.70315724682470  |
| Pt | -0.28267730012269 | 0.49064727596044  | -1.65932706433640 |
| Pt | -0.31388986239117 | 1.12021168343777  | 1.09465508394156  |
| Pt | -0.32269051064674 | 2.85767445192787  | -0.79767442818181 |
| Pt | -2.42481915286648 | -0.96922364801071 | -1.28269746292602 |
| Pt | -2.58079021091854 | -1.25433555274334 | 1.44702904242465  |
| Pt | -2.51424709410976 | 2.06120587958832  | 0.29411933776093  |
| Pt | -4.23426293286526 | 0.22078299495959  | 0.22980169371905  |

### Pt<sub>17\_1</sub>

|    |                   |                   |                   |
|----|-------------------|-------------------|-------------------|
| Pt | -1.74785205534511 | -3.27409201997187 | 0.00013765566559  |
| Pt | -2.19454363524043 | -1.18667117747465 | 1.38658216798780  |
| Pt | -2.61713704586646 | 1.04654871861378  | 2.54897407390122  |
| Pt | 0.74787135946442  | -2.85070532028757 | 0.00000435917382  |
| Pt | 3.24467326279591  | -2.41664579666271 | 0.00000844348542  |
| Pt | 0.29631197026039  | -0.70408538678237 | 1.34691046781771  |
| Pt | -0.12549784015134 | 1.54313247818205  | 2.49929994019598  |
| Pt | 2.76718034235212  | -0.20653923153848 | 1.26030030173454  |
| Pt | 2.10559965113622  | 2.24733187592982  | 1.40232279534396  |
| Pt | -2.19428220795922 | -1.18623357991033 | -1.38560100253840 |
| Pt | -2.57070588775124 | 1.19638344260928  | 0.00072223031716  |
| Pt | -2.61898821439605 | 1.04675174531272  | -2.54752878915908 |
| Pt | 0.29703751332421  | -0.70421026868584 | -1.34749805200048 |
| Pt | -0.13484502050766 | 1.86532758777002  | -0.00028906221193 |
| Pt | -0.12735546971035 | 1.54278594864968  | -2.49970732699485 |
| Pt | 2.76770684618256  | -0.20607866991896 | -1.25973253741154 |
| Pt | 2.10482543141203  | 2.24699965416541  | -1.40490766530693 |

### Pt<sub>17\_2</sub>

|    |                   |                   |                   |
|----|-------------------|-------------------|-------------------|
| Pt | -1.30071590570662 | -2.98114350507865 | -0.01454861720070 |
| Pt | -2.50720582976098 | -0.66696851755488 | 0.76664309282224  |
| Pt | -2.42594073280159 | 1.16933609613103  | 2.60220670877155  |

|    |                   |                   |                   |
|----|-------------------|-------------------|-------------------|
| Pt | 1.33197344080755  | -2.80729462950293 | -0.55976859327860 |
| Pt | 2.46902121554166  | -1.26019475566966 | 1.21870904462755  |
| Pt | -0.02263828028062 | -0.98439630108746 | 1.13064601342871  |
| Pt | 0.10519730537173  | 1.18674180156457  | 2.45282000211119  |
| Pt | 2.63379072825299  | 1.08834459457835  | 2.23970438984568  |
| Pt | 2.29919289068333  | 1.71344304694731  | -2.70598557576806 |
| Pt | 2.61807026687983  | -0.37317830631013 | -1.17471067970627 |
| Pt | -2.30491017831860 | -1.24922373818352 | -1.68897705913488 |
| Pt | -2.60893772864597 | 1.77451177336755  | 0.10137819272096  |
| Pt | -2.73969220912710 | 1.19297519525539  | -2.37526528471574 |
| Pt | 0.14390447082935  | -0.72090991009144 | -1.55925636642534 |
| Pt | -0.08516770137822 | 1.72087677586497  | -0.03654503549101 |
| Pt | 2.42699834257468  | 1.94196147806492  | -0.14874632060733 |
| Pt | -0.23463992412144 | 1.58571000790457  | -2.57929054279993 |

**Pt<sub>17\_3</sub>**

|    |                   |                   |                   |
|----|-------------------|-------------------|-------------------|
| Pt | -2.09039544866261 | -3.16139231547537 | -0.20036619187338 |
| Pt | -2.05671246855048 | -1.37658449663417 | 1.65669414070448  |
| Pt | -2.20848461840247 | 1.00928947379408  | 2.55538136010064  |
| Pt | 0.44080407247511  | -2.94109796777134 | -0.23923128542637 |
| Pt | 2.66326755530333  | -1.97565786930141 | 0.58275309795481  |
| Pt | 0.43333612847638  | -0.95239838448088 | 1.33896087710281  |
| Pt | 0.29331071166780  | 1.32180297792209  | 2.48443942722977  |
| Pt | 2.52509467964575  | 2.36307773823051  | 2.39074915944205  |
| Pt | 2.44998078799805  | 1.91328581488883  | -2.63787214669898 |
| Pt | 2.59781027045204  | -0.16568156159121 | -1.15741997039358 |
| Pt | -2.30634634196972 | -1.20982367227317 | -1.82972738786542 |
| Pt | -2.29143592759291 | 0.50502175115033  | 0.01144767177130  |
| Pt | -2.54787002205858 | 1.28184747365951  | -2.43684152553441 |
| Pt | 0.19028792440000  | -0.77975647299535 | -1.57202681144546 |
| Pt | 0.04735316347527  | 1.60662948586343  | -0.01840409914385 |
| Pt | 2.48624104360696  | 2.19140479809879  | -0.08337143107568 |
| Pt | -0.04588151026394 | 1.57095522691534  | -2.56844188484871 |
